# Supplementary material for: Second Primary Lung Cancer after Breast Cancer: A Case Series
Source: Research Square preprint supplement (doi:10.21203/rs.3.rs-2693053/v1), 2023-03-20
Supplement: Supplementary file 1 [file b9b35a997d8ce4569cbfeeee.docx]

| Table 3. Lung cancer Characteristics | | | | | | | | | | |
| --- | --- | --- | --- | --- | --- | --- | --- | --- | --- | --- |
| LC | **Symptoms** | Dyspnea Class I NYHA and functional class deterioration | 1y of respiratory symptoms: Cough and mobilization of secretions. | Asymptomatic | Wet cough, weight loss (5kg) for 6 months | A month: cough dry, pleuritic chest pain, constitutional symptoms, Functional class ii (NYHA). | Asymptomatic | Intermittent neurological symptoms for two months and dysphonia during a month | Left hemiparesis. | Cough dry, dyspnea for 2 months. |
| Diagnosis | **Year of diagnosis** | 2019 | 2018 | 2018 | 2016 | 2019 | 2019 | 2014 | 2019 | 2013 |
|  | **Time from BC to LC** | 17y | 14y | 2y | 11y | 4y | 1y | 13y | 7y | 3y |
|  | **Thoracic CT findings / LC anatomical site** | Nodule 1,1 with an increase in the size 5 months later CT showed nodule 1,3 / Peripheral in the right upper lobe | Nodule 1,9 / Peripheral in the apical segment of the right upper lobe | Mass 3 left lower lobe with satellite nodule/ Peripheral | nodule 2,2/ Peripheral in the left upper lobe | Mass 3,1/ Central location in the left lower lobe.  And pleuritic infiltration. | Nodule 3,2/ Peripheral location at the middle lobe | Mass 3,5/ Central and peripheral location in the left upper lobe | No data/ No data | nodule 1,5/ No data |
|  | **LC Stage at diagnosis** | IA | No data | IV B (metastases of the central nervous system) | IA | IVB (Bone metastases) | IVB (metastases in cervical region) | IVB (metastases of the central nervous system) | IVA (metastases of the central nervous system and mediastinum) | III B |
|  | **Type of LC** | Enteric Adenocarcinoma of classical morphology (70%) | Adenocarcinoma | Adenocarcinoma | Adenocarcinoma with lepidic pattern | Adenocarcinoma | Adenocarcinoma | Adenocarcinoma | Adenocarcinoma | Adenocarcinoma: Lepidic pattern |
|  | **LC mutation** | Negative | 80% PD-L1 | 60% PD-L1 | Negative | EGFR L858R | EGFR 19† suppression exon 19 | Negative | 60% PD-L1 | EGFR 19† / ROS-1 |
| Treatment | **Surgery** | Right upper lobectomy and lymph node emptying. | No data | No | Lobectomy of the left upper lobe and lymph node emptying. | Decortication pulmonary and Pleurodesis. | Pulmonary Wedge | No | No | Lobectomy of the right lower lobe |
|  | **Radiotherapy/ Chemotherapy** | No/ No | Yes/ Yes | No/ No (Just palliative care) | No/ No | No/ No | Yes/ Capecitabine plus Ixabepilone (palliative chemotherapy). With a new progression Gemcitabine were initiated | Yes/ Capecitabine plus Ixabepilone (palliative chemotherapy | Palliative holo-cranial radiotherapy/ Maintenance therapy with Pemetrexed and Pembrolizumab since June 2019 | No/ Carboplatin/Vinorelbine was started, after presenting adverse effects with Ixabepilone/capecitabine at first. |
|  | **Immunotherapy** | No | No | Pembrolizumab | No | No | No | No | Pemetrexed | No |
|  | **Tyrosine Kinase Inhibitors** | No | No |  | No | Erlotinib | No | No | Yes, anti PDL-1 | No |
|  | **Follow-up1** | 3 | 2,1 | 20,3 | 33,8 | 1,4 | 4,4 | 0,4 | 7 | 22,5 |

1: Time in months from the diagnosis of LC to last medical examination, y: time in years, * The patient had no clinical follow-up, only the diagnosis was made at our hospital, † Exon 19 deletion (EGFR mutation)
