# Supplementary material for: Second Primary Lung Cancer after Breast Cancer: A Case Series
Source: Research Square preprint supplement (doi:10.21203/rs.3.rs-2693053/v1), 2023-03-20
Supplement: Supplementary file 2 [file be1da95719024985657352fb.docx]

| Table. 2 Breast Cancer characteristics | | | | | | | | | | |
| --- | --- | --- | --- | --- | --- | --- | --- | --- | --- | --- |
|  |  | **Patient 1** | **Patient 2*** | **Patient 3** | **Patient 4** | **Patient 5** | **Patient 6** | **Patient 7** | **Patient 8** | **Patient 9** |
| BC  Diagnosis | **Year of diagnosis/ Age of diagnosis** | 2002 / 60y | 2004 / 56y | 2016 / 73y | 2005 / 57y | 2015 / 66y | 2018 / 35y | 2001 / 54y | 2012 / 47y | 2010 /58y |
|  | **Type of cancer/ BC anatomical site** | Ductal carcinoma / Left | Ductal carcinoma without ganglionar compromise / Left | Infiltrating ductal carcinoma / Right | Ductal carcinoma / Left | Ductal carcinoma invasive / Right | Infiltrating ductal Carcinoma / Right | Ductal carcinoma / Right | Ductal carcinoma Luminal B / Right | Ductal carcinoma with recurrence 1 year after / Right |
|  | **Score Nottingham/ BC stage** | 2 / I | No data/ No data | 2/ II A | No data/ II A | 3/ II B | 3/ III B | No data/ No data | 1/ II A | 1/III A |
|  | **BC Receptors** | PR − ER – HER2 – | PR − ER – HER2 – | PR + ER + HER2 – | PR − ER − HER2 – | PR − ER − HER2 – | PR − ER − HER2 – | PR − ER − HER2 – | PR − ER − HER2 3+ | PR − ER − HER2 – |
| Treatment | **Radiotherapy/ Chemotherapy** | Yes / Cyclophosphamide, Methotrexate, and Fluorouracil. | Yes / Cyclophosphamide, Methotrexate, and Fluorouracil | Yes / No | Yes / No | Yes / Four cycles of Fluorouracil, Adriamycin, and Cyclophosphamide scheme plus paclitaxel. | Yes** / Doxorubicin and cyclophosphamide plus fosaprepitant | Yes / AC (Adriamycin and Cyclophosphamide) and Tamoxifen during 5y | Yes / Adriamycin, cyclophosphamide and Taxol, Trastuzumab | Yes / Cisplatin/carboplatin plus paclitaxel |
|  | **Taxanes** | No | No | No | No | No | Yes | No | Yes | No |
|  | **Surgery** | Quadrantectomy (right breast) and lymph node emptying | Quadrantectomy and lymph node emptying | Yes | Mastectomy and lymph node emptying. | Quadrantectomy and lymph node emptying. | Mastectomy and lymph node emptying | Mastectomy and lymph node emptying | Quadrantectomy and lymph node emptying. | Quadrantectomy, and lymph node emptying. Followed by mastectomy 1 year after. |
|  | **Others** | No | No | Tamoxifen during 3 years since 2016 to 2019. Anastrozole since 2019 | No | No | No | Tamoxifen | Trastozumab  Tamoxifen, then Anastrazole | Tamoxifen for 3 months, then Anastrozole |
|  | **Follow-up1** | 215 | 180 | 38 | 173 | 43 | 11 | 160 | 90 | 69 |

1: Time in months from the diagnosis of BC to last medical examination, * The patient had no clinical follow-up, only the diagnosis was made at our hospital, RE: estrogen receptor; RP: progesterone receptor, **: Radiotherapy to BC, y: time in years
